# Supplementary material
Source: publisher figshare collection journal article supplement (https://aacr.figshare.com/articles/dataset/_/22430106)

Supplementary Figure S6.

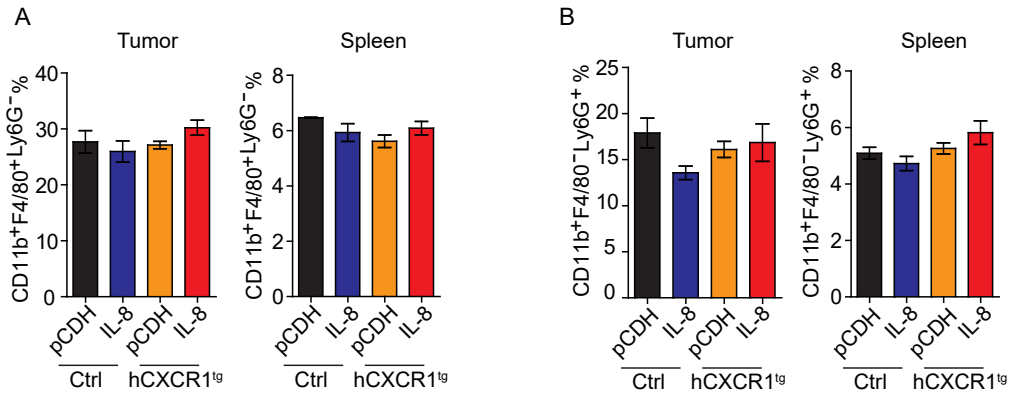

Supplement: Supplementary file 1 [file 39876438]
